# Supplementary material for: Synthesis and photophysical characterization of a subphthalocyanine fused dimer–C60dyad
Source: Royal Society of Chemistry journal article supplement (doi:10.1039/b502041g), 2005-01-01
Supplement: b502041g.pdf [file b502041g.pdf]

## Synthesis and Photophysical Characterization of a Subphthalocyanine Fused Dimer – C<sub>60</sub> Dyad

Rodrigo S. Iglesias, Christian G. Claessens, Tomás Torres, G. M. Aminur Rahman  
and Dirk M. Guldi

---

## SUPPORTING INFORMATION

---

|         |                                                                          |
|---------|--------------------------------------------------------------------------|
| 2.....  | General Remarks                                                          |
| 3.....  | Compound <b>3a</b>                                                       |
| 9.....  | Compound <b>1</b>                                                        |
| 17..... | Time resolved fluorescence decay of <b>2a</b> and <b>1</b>               |
| 18..... | Differential absorption spectrum of <b>2a</b>                            |
| 19..... | Time-absorption profiles of <b>2a</b> and <b>1</b> singlet excited state |

**General Remarks:**

UV/Vis spectra were recorded with a Hewlett-Packard 8453 instrument. IR spectra were recorded on a Bruker Vector 22 spectrophotometer. HRMS spectra were determined on a VG AutoSpec instrument. MALDI-TOF MS were recorded with a Bruker Reflex III spectrometer. NMR spectra were recorded with a BRUKER AC-300 instrument and a BRUKER DRX-500 instrument. Column chromatographies were carried out on silica gel Merck-60 (230-400 mesh, 60 Å), and TLC on aluminum sheets precoated with silica gel 60 F<sub>254</sub> (E. Merck). Chemicals were purchased from Aldrich Chemical Co. and used as received without further purification.

**Supplementary data for:**

---

**COMPOUND 3a**

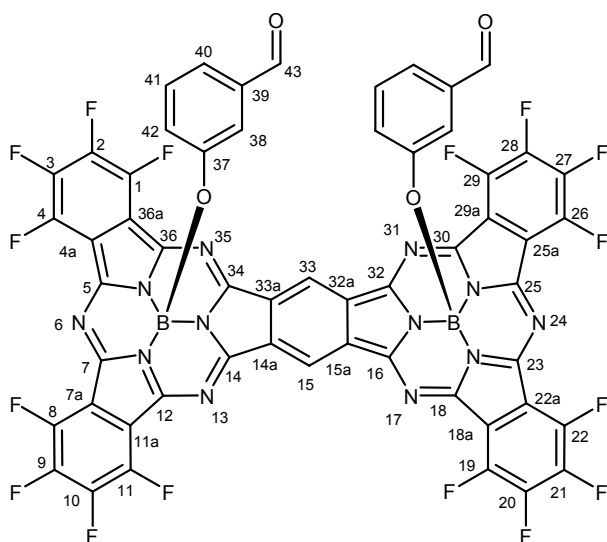

**Compound 3a:** To a 25 ml round-bottom two-neck flask equipped with a reflux condenser and magnetic stirrer, a 1.0 M solution of BCl<sub>3</sub> (5.5 ml g, 5.5 mmol, 11 eq) in *p*-xylene was added to a mixture of 1,2,4,5-tetracyanobenzene (0.090 g, 0.5 mmol, 1 eq) and tetrafluorophthalonitrile (1g, 5 mmol, 10 eq) under argon atmosphere. The mixture heated at *p*-xylene reflux (136-138°C) for 1-2 hours. The reaction crude was then cooled down to room temperature and flushed with argon. After evaporation of *p*-xylene, 3-hydroxybenzaldehyde was added in excess (1.1 g, 9.1 mmol, 10:1 proportion with respect to a 100% yield). The reaction was carried without solvent in molten 3-hydroxybenzaldehyde, for 1-2 h at 110°C. After cooling down to room temperature, the excess of phenol was removed by washing the crude with a methanol/water 1:1 solution. After purification by column chromatography in silica gel using hexane/dichloromethane/acetone 4:2:1 as eluent, compound **4a** was collected as a dark blue solid, 30 mg (5% with respect to 1,2,4,5-tetracyanobenzene); m.p. > 250°C; <sup>1</sup>H-NMR (CDCl<sub>3</sub>, 298K, 200 MHz):  $\delta$ (ppm) = 10.39 (s, 2H, H-15, H-33), 9.71 (s, 2H, H-43), 7.29 (d,  $J_o$  = 7.9 Hz, 2H, H-40), 7.07 (t,  $J_o$  = 7.8 Hz, 2H, H-41), 6.06 (s, 2H, H-38), 5.72 (dd,  $J_o$  = 7.8 Hz,  $J_m$  = 1.4 Hz, 2H, H-42); FT-IR (KBr),  $\bar{\nu}$  (cm<sup>-1</sup>): 1636 (C=O), 1534, 1483 (C-N), 1105, 1082; UV-Vis (CHCl<sub>3</sub>):  $\lambda_{\max}$ (nm) (log  $\epsilon$  (dm<sup>3</sup>mol<sup>-1</sup>cm<sup>-1</sup>)): 691 (5.0), 660 (4.4), 633 (4.5), 603 (4.5), 590 (sh), 490 (3.9), 450 (3.8), 319 (4.6); MALDI-TOF (*m*-NBA):  $m/z$  = 1242 [M]<sup>+</sup>, 1121 [M-one axial group]<sup>+</sup>, 1000 [M-two axial groups]<sup>+</sup>; HRMALDI calcd for C<sub>56</sub>H<sub>12</sub>B<sub>2</sub>N<sub>12</sub>O<sub>4</sub>F<sub>16</sub>: [M]<sup>+</sup>:  $m/z$ : 1242.103510, found 1242.105010; elemental analysis calcd (%) for C<sub>56</sub>H<sub>12</sub>B<sub>2</sub>N<sub>12</sub>O<sub>4</sub>F<sub>16</sub>: C 54.14, H 0.97, N 13.53; found C 53.85, H 1.05, N 14.23.

$^1\text{H}$  NMR ( $\text{CDCl}_3$ , 300 MHz, 298 K)

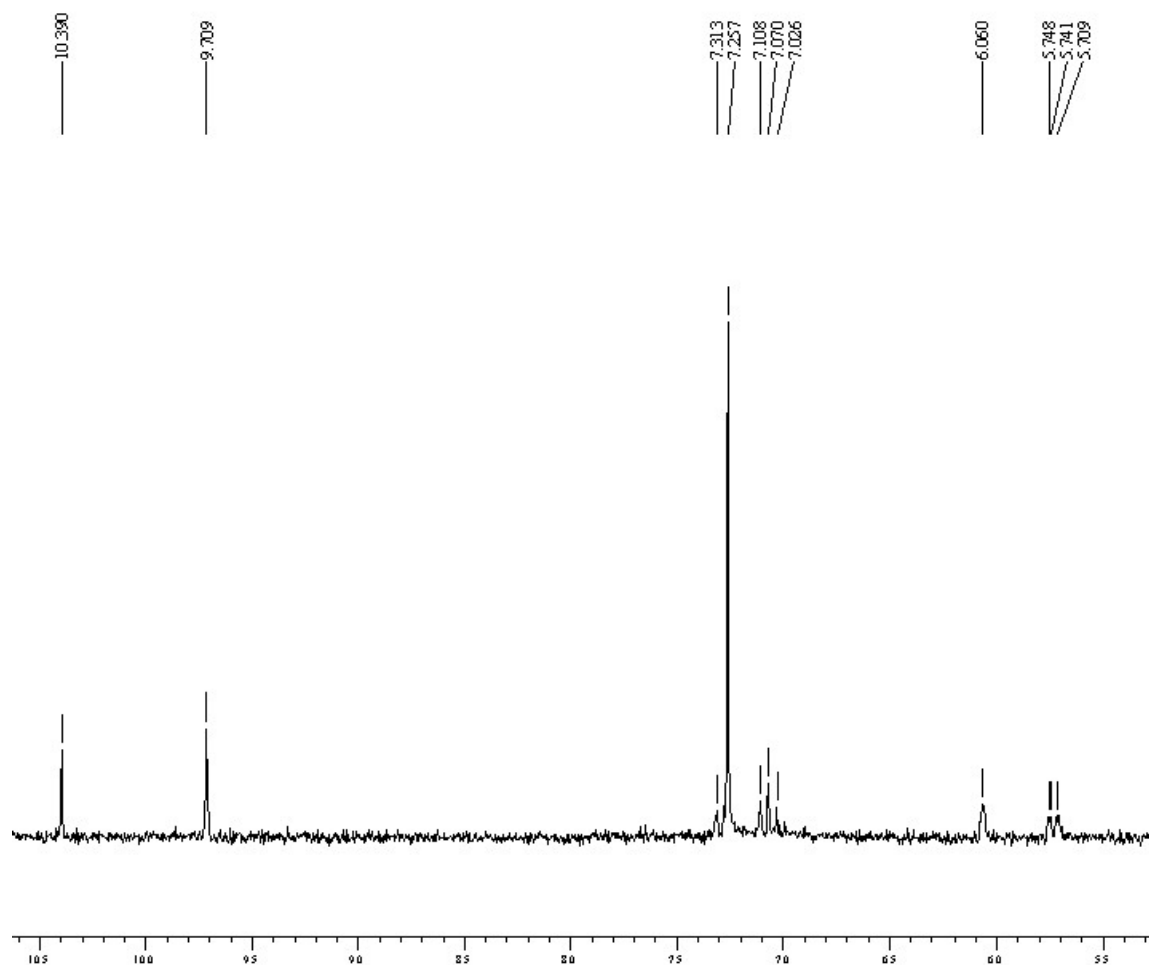

MALDI-TOF

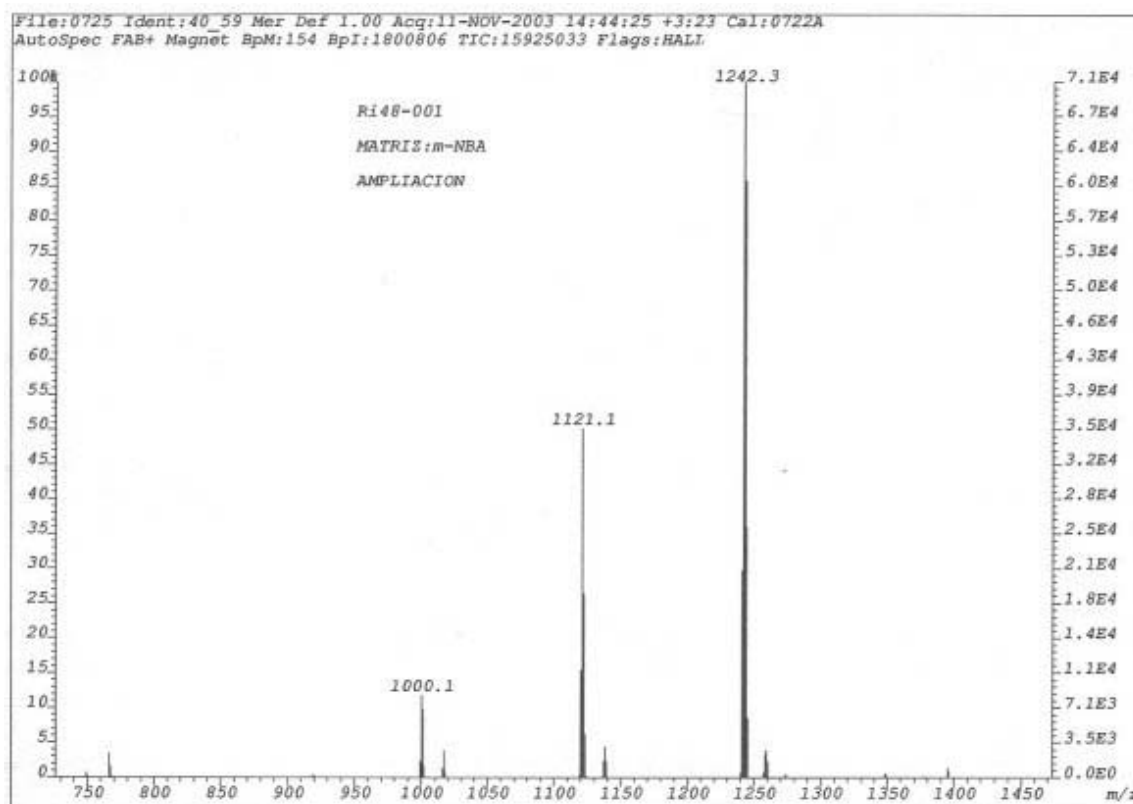

HRMALDI (Isotopic pattern)

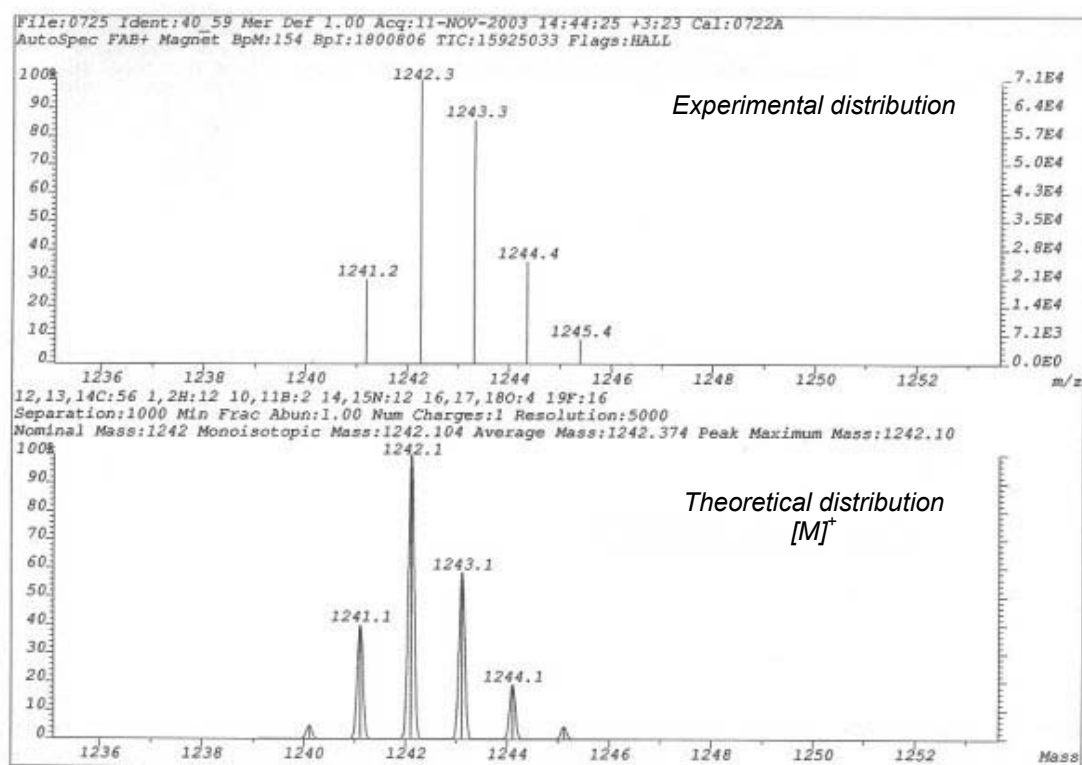

FT-IR

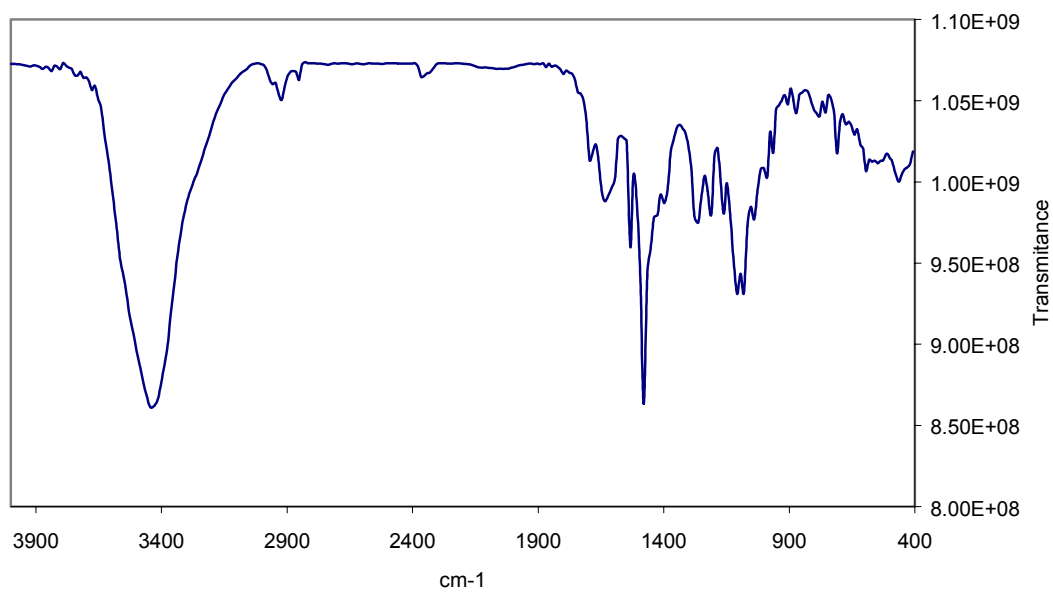



**Supplementary data for:**

---

**COMPOUND 1**

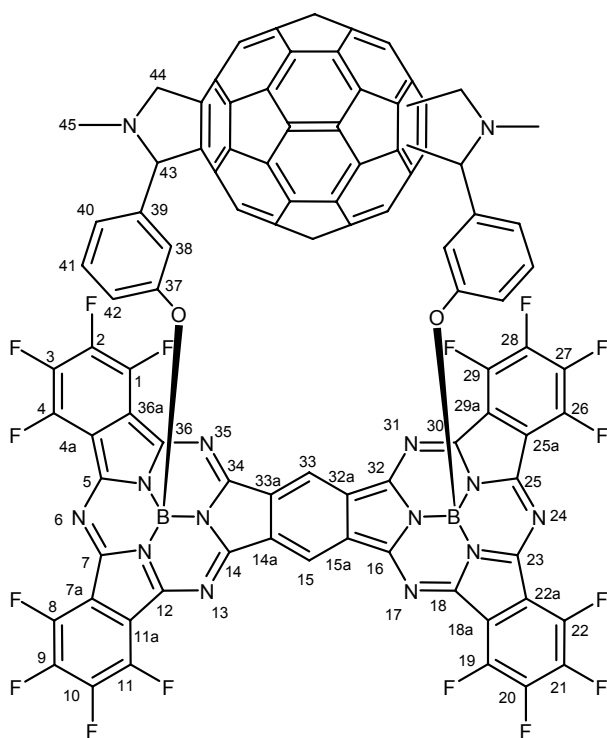

**Compound 1:** A dry toluene solution (40 mL) of 45 mg (0.04 mmol) of compound **3a**, 52 mg (0.07 mmol) of C<sub>60</sub>-fullerene, and 20 mg (0.22 mmol) of sarcosine (*N*-methylglycine) was heated to reflux under argon atmosphere for 18 h. The solution was then cooled down to room temperature and the solvent evaporated in *vacuo*. The product (**1**) (*R*<sub>f</sub> = 0.19) was isolated by column chromatography in silica gel, using toluene as eluent: blue powder, 12 mg (16%); <sup>1</sup>H-NMR (500 MHz, C<sub>2</sub>D<sub>2</sub>Cl<sub>4</sub>): δ(ppm) = 10.20-9.40 (m, 2H, H-15, H-33), 6.4-5.6 (m, 2H, H-38), 5.50-3.50 (m, 6H, H-40, H-41, H-42), 2.80-2.10 (m, 6H, H-45); Protons 43 and 44 could not be identified; <sup>19</sup>F-NMR (470 MHz, CDCl<sub>3</sub>): δ(ppm) = -137.6 (m, 8F, F-1, F-4, F-8, F-11, F-19, F-22, F-26, F-29), -148.7 (m, 8F, F-2, F-3, F-9, F-10, F-20, F-21, F-27, F-28); FT-IR (KBr),  $\bar{\nu}$  (cm<sup>-1</sup>): 2923, 2852, 1635, 1483 (C-N), 1098; UV-Vis (CHCl<sub>3</sub>): λ<sub>max</sub>(nm) (log ε (dm<sup>3</sup>mol<sup>-1</sup>cm<sup>-1</sup>)): 694 (5.0), 659 (4.6), 634 (4.6), 606 (4.7), 590 (sh), 491 (4.2), 310 (4.9), 269 (5.1); MALDI-TOF (dithranol): *m/z* = 2017 [M]<sup>+</sup>, 1296 [M-C<sub>60</sub>]<sup>+</sup>; HRMALDI calcd for C<sub>120</sub>H<sub>22</sub>B<sub>2</sub>N<sub>14</sub>O<sub>2</sub>F<sub>16</sub>: [M]<sup>+</sup>: *m/z*: 2016.198079, found 2016.194500; elemental analysis calcd (%) for C<sub>120</sub>H<sub>22</sub>B<sub>2</sub>N<sub>14</sub>O<sub>2</sub>F<sub>16</sub>: C 71.45, H 1.10, N 9.72; found C 72.22, H 1.03, N 9.32.

$^1\text{H}$  NMR ( $\text{C}_2\text{D}_2\text{Cl}_4$ , 500 MHz)

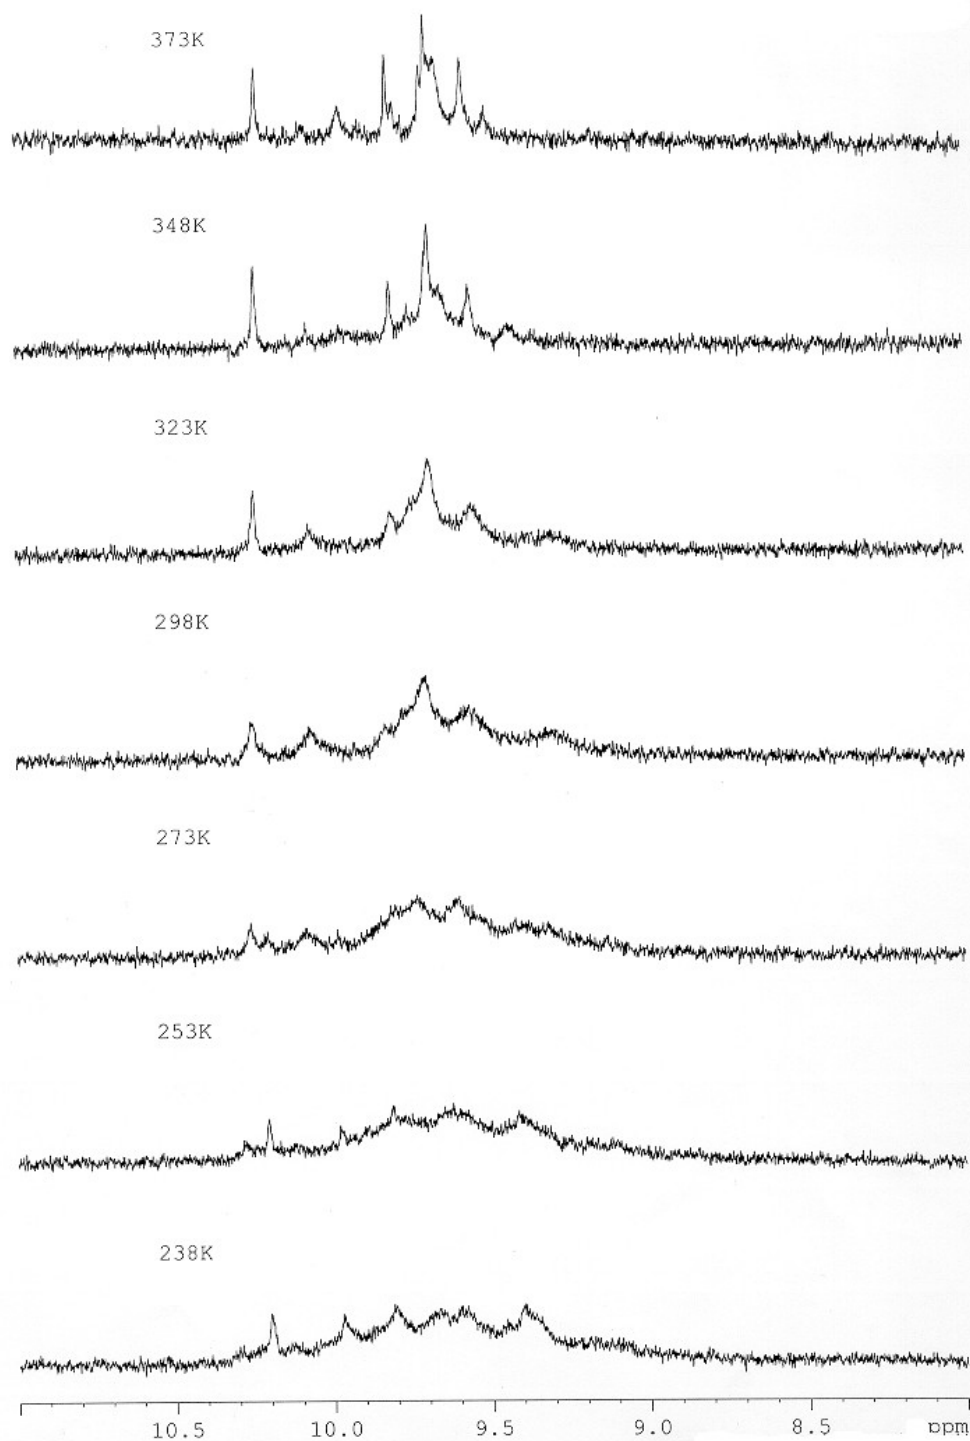

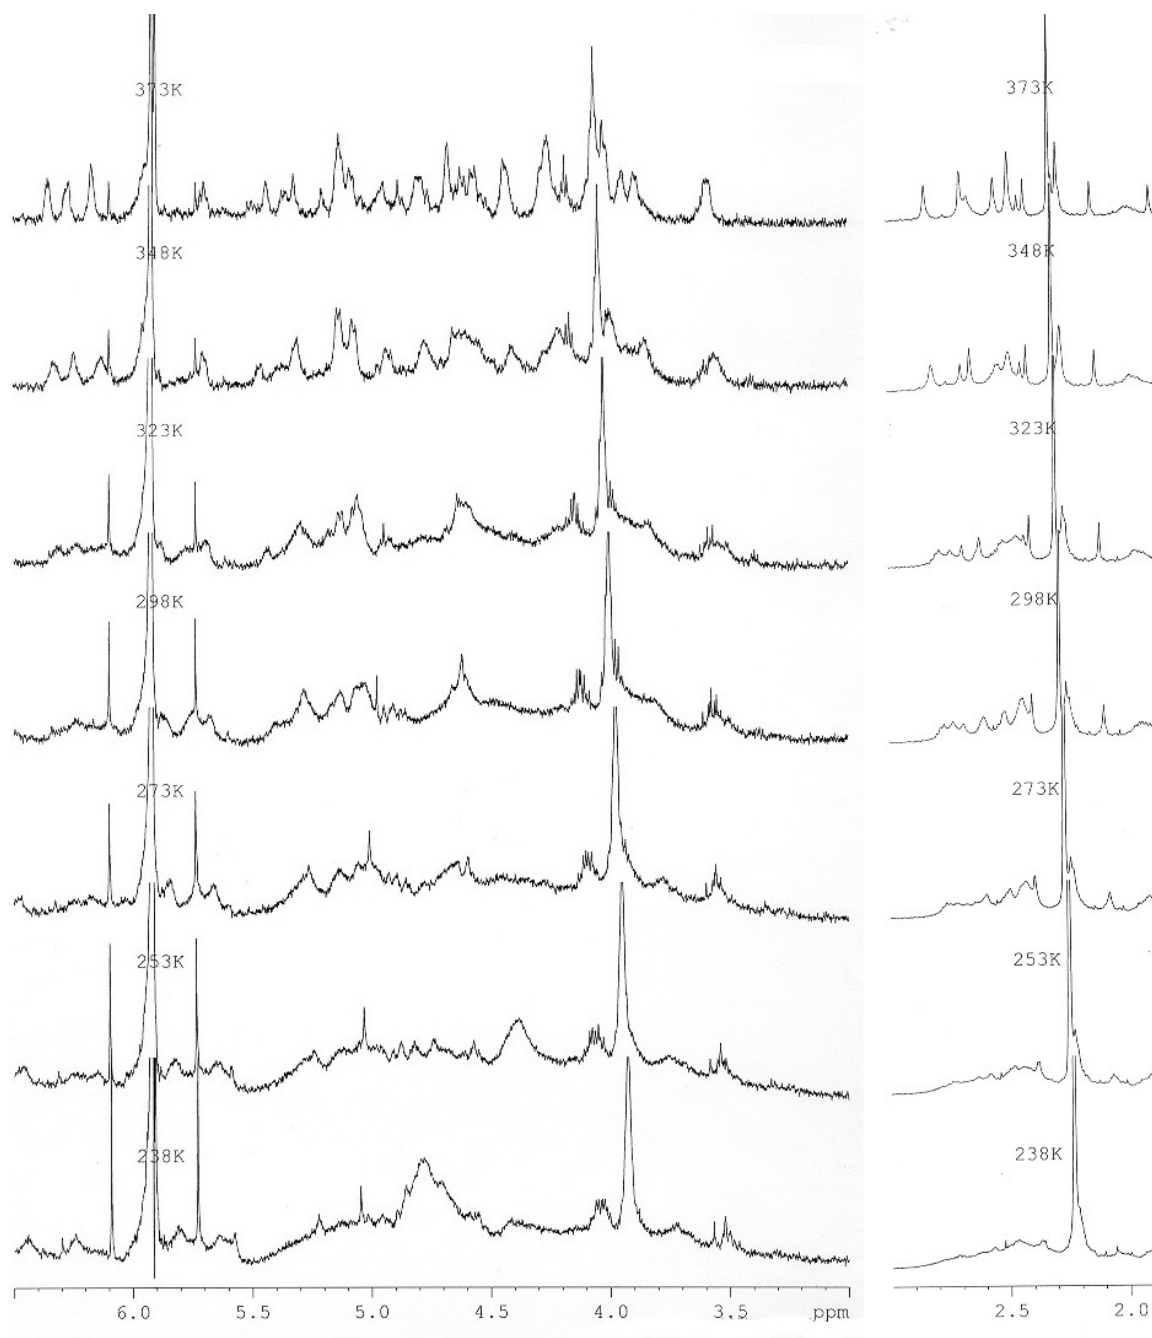

$^{19}\text{F}$  NMR ( $\text{CDCl}_3$ , 470 MHz)

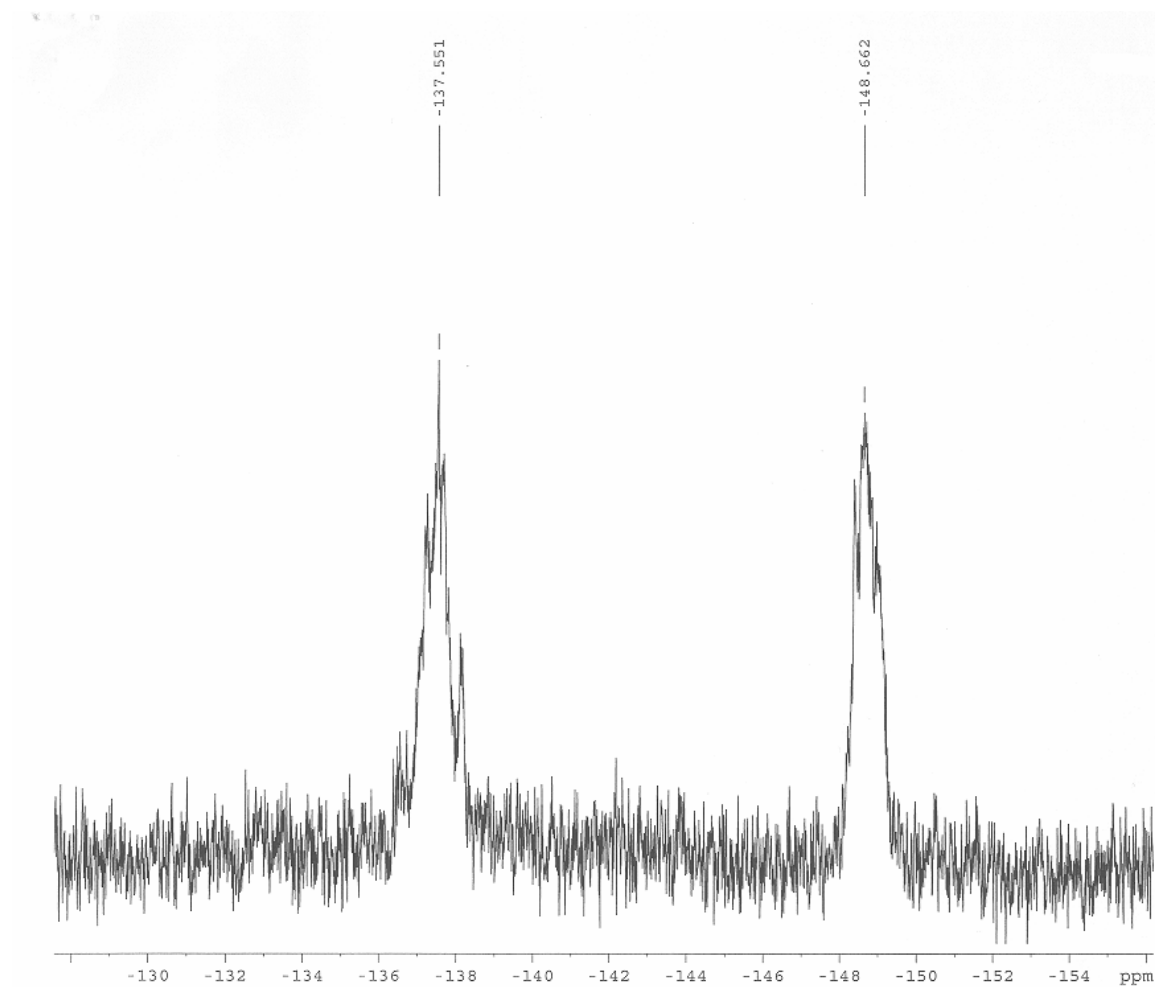

MALDI-TOF (dithranol)

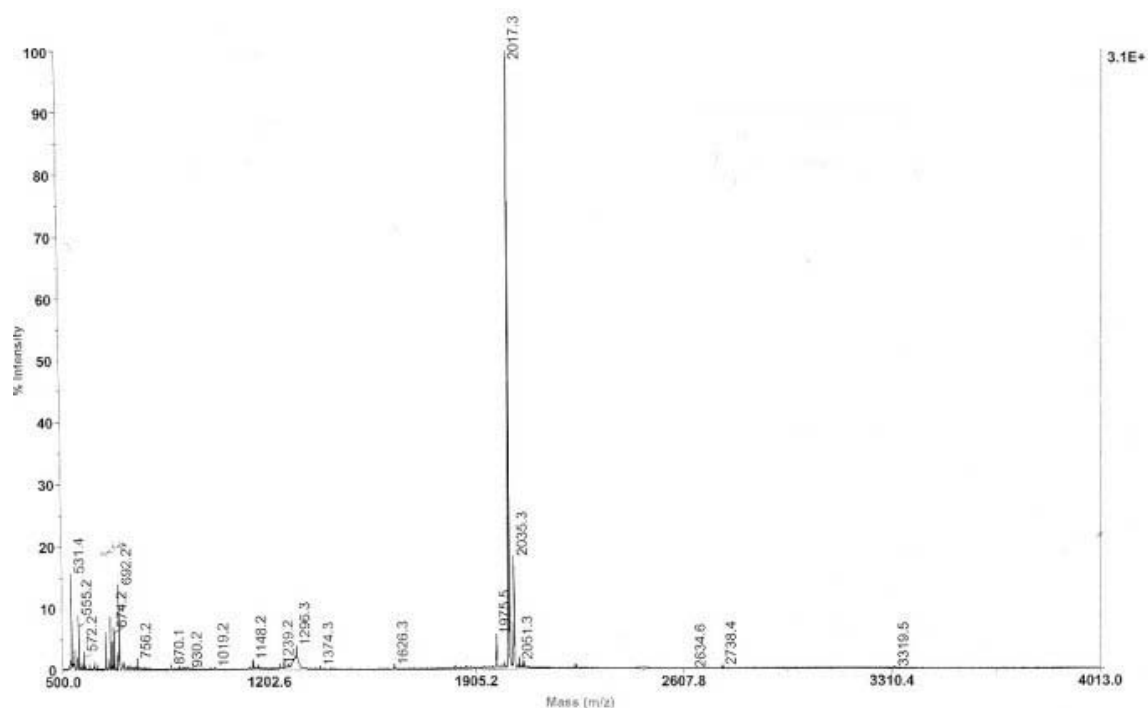

HRMALDI (Isotopic pattern)

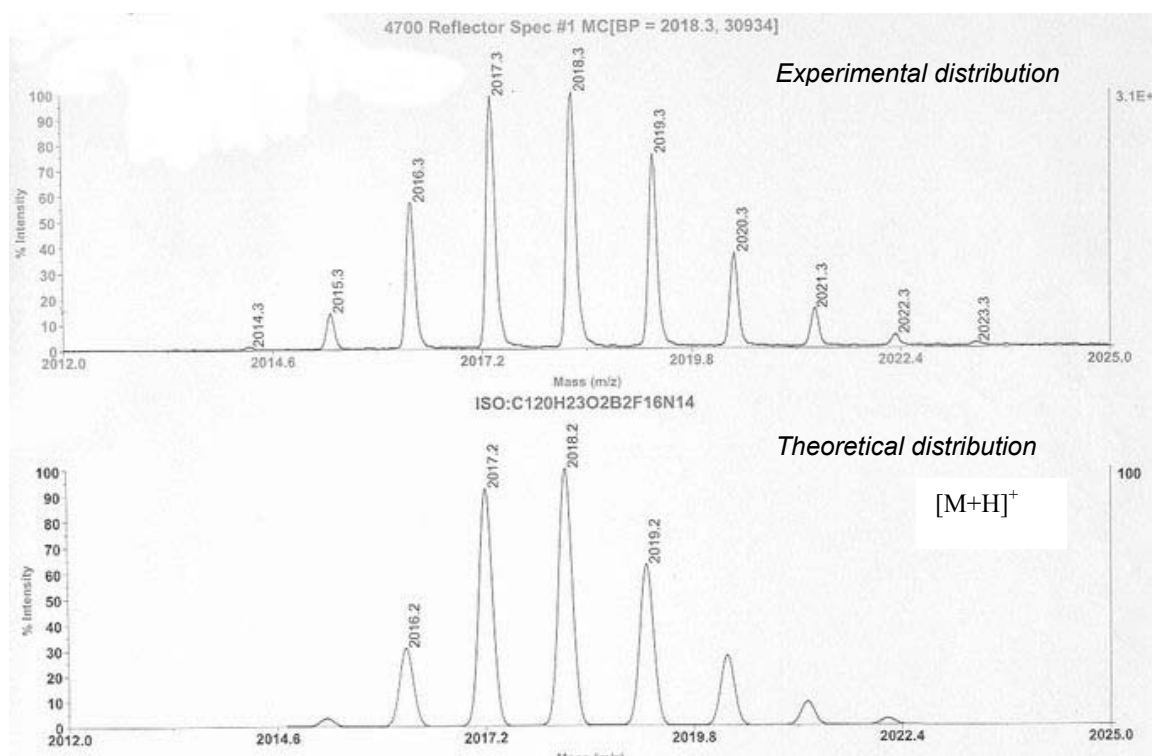

FT-IR

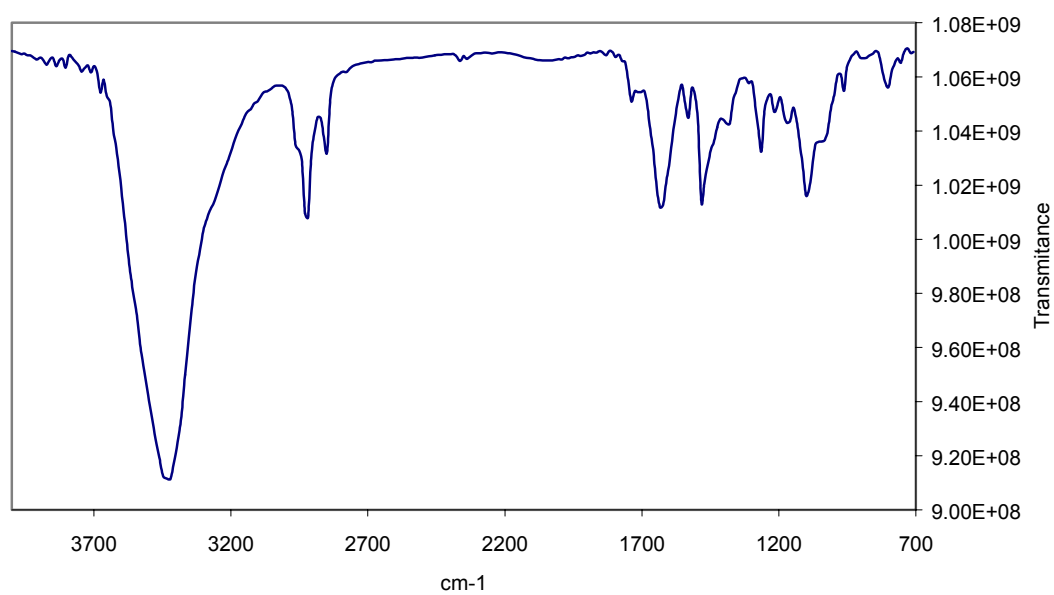



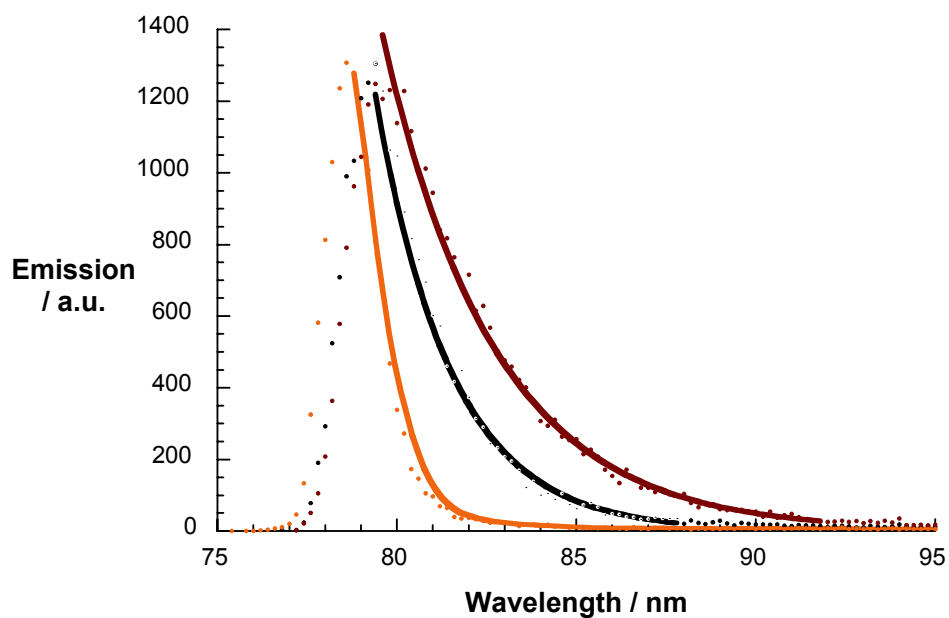

**Figure S1:** Time resolved fluorescence decay of **2a** (red line), **1** (black line), and laser scatterer (orange line) in room temperature solutions ( $5 \times 10^{-6}$  M) – 337 nm excitation wavelength and 710 nm monitoring wavelength.

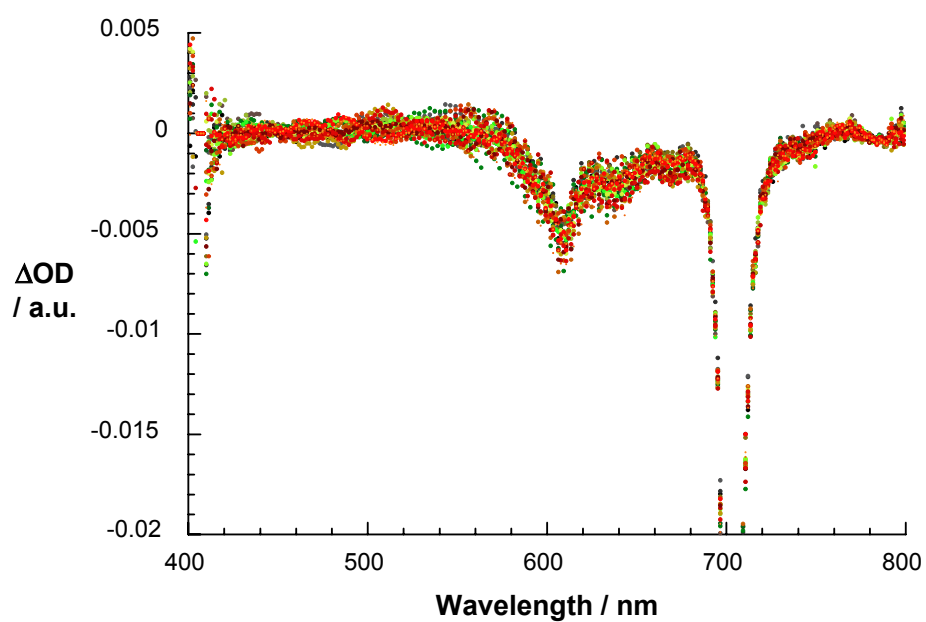

**Figure S2.** Differential absorption spectrum (visible) obtained upon femtosecond flash photolysis (391 nm) of  $\sim 1.0 \times 10^{-5}$  M solutions of **2a** in nitrogen saturated toluene with a several time delay between 0 and 4 ps at room temperature. The spectrum corresponds to the changes that are associated with the formation of the SubPc dimer singlet excited state.

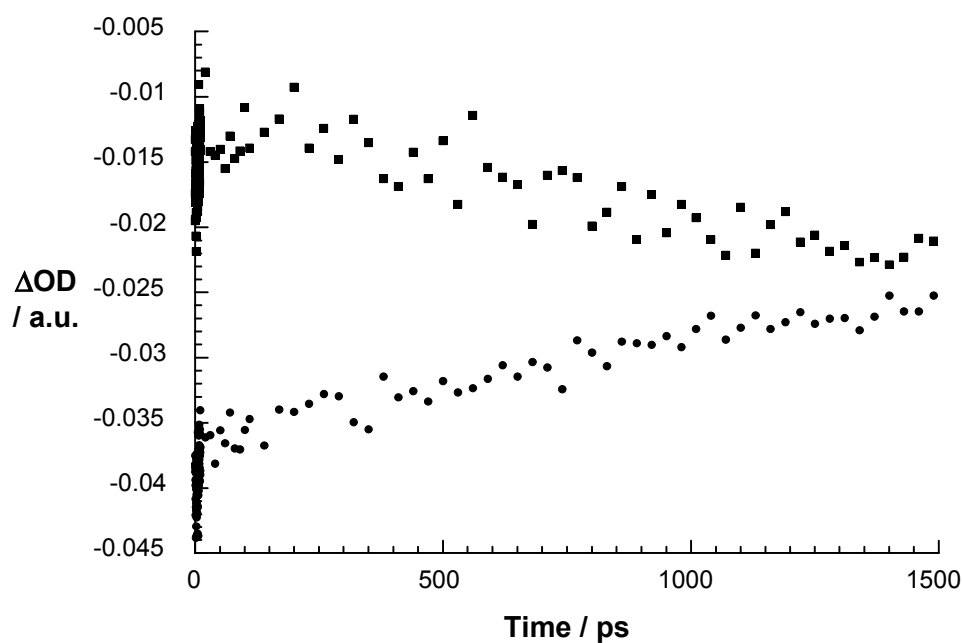

**Figure S3:** Time-absorption profiles of the SubPc dimer singlet excited state recorded at 700 nm for **2a** (circles) – corresponding to the spectra shown Figure 3 – and for **1** (squares).
